# Supplementary material
Source: Springer Nature journal article supplement (https://www.springermedizin.de/resource/supplementary/12961_2009_149_MOESM2_ESM.pdf/9571546)

# Local Health Policy Context

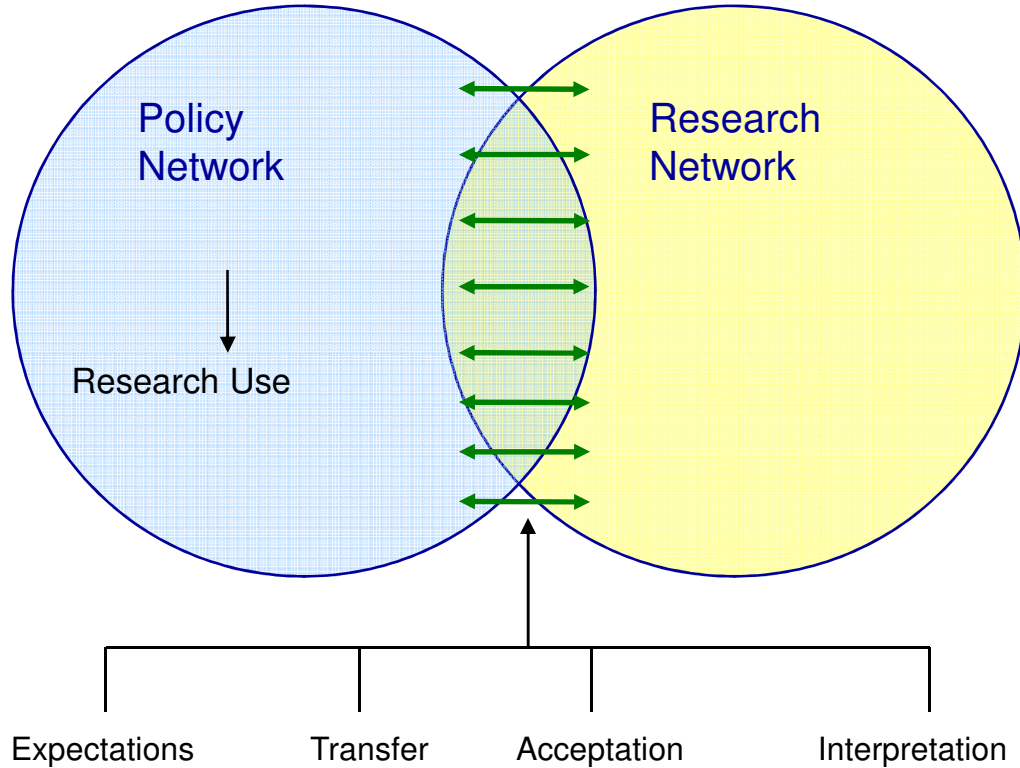

Supplement: MOESM2 [file 9571546]
